# Supplementary material
Source: Springer Nature journal article supplement (https://www.springermedizin.de/resource/supplementary/12911_2011_556_MOESM2_ESM.pdf/9525832)

# Scenario 2

## A

OP + CTH for 6 months

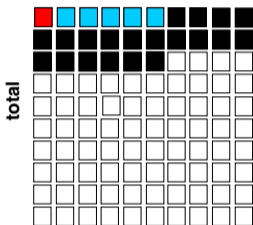

death by therapy  
local recurrence  
distant metastasis

survival rate in A = B

## B

OP + CTH for 6 months

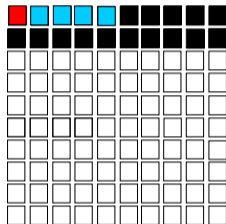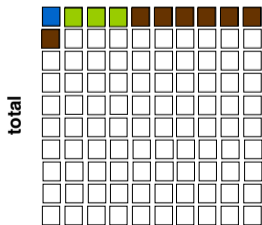

severe neurologic disorder during treatment

lasting after 18 months

nausea + vomiting

diarrhea

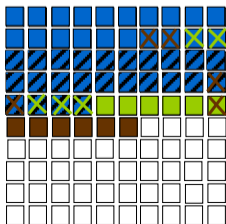

Supplement: MOESM2 [file 9525832]
